# Supplementary material for: Modeling the sensing characteristics of chemi-resistive thin film semi-conducting gas sensors
Source: Royal Society of Chemistry journal article supplement (doi:10.1039/c7cp04241h), 2017-01-01
Supplement: c7cp04241h1.pdf [file c7cp04241h1.pdf]

**Supplementary file:**

Ms Title: Modeling the sensing characteristics of chemi-resistive thin film semi-conducting gas sensors

Ms ID: CP-ART-06-2017-004241

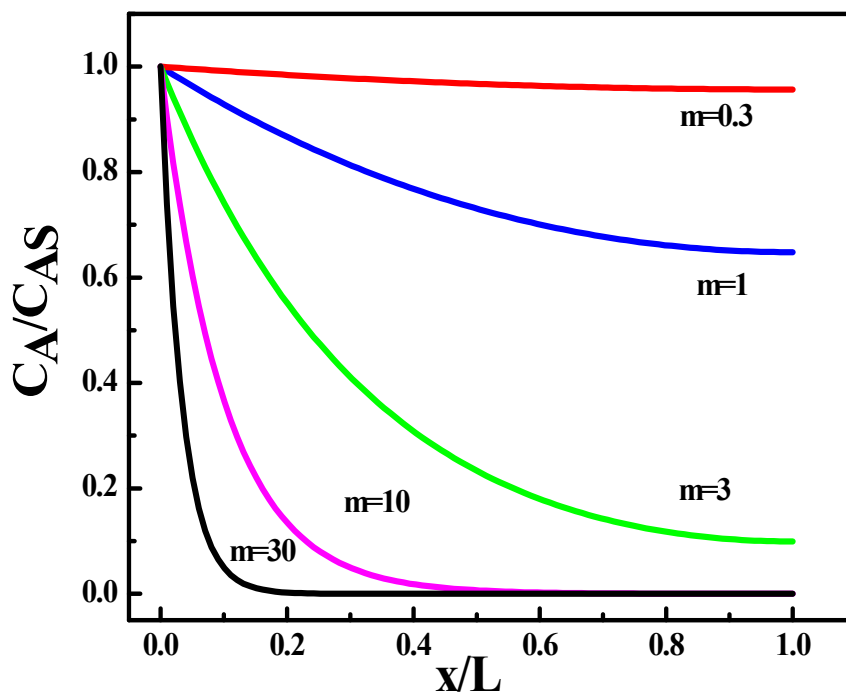

**Fig.S1** Simulated variation of test gas concentration with depth of penetration from the surface of the thin film sensing elements for various  $m (=L \cdot (k/D_k)^{1/2})$  values.

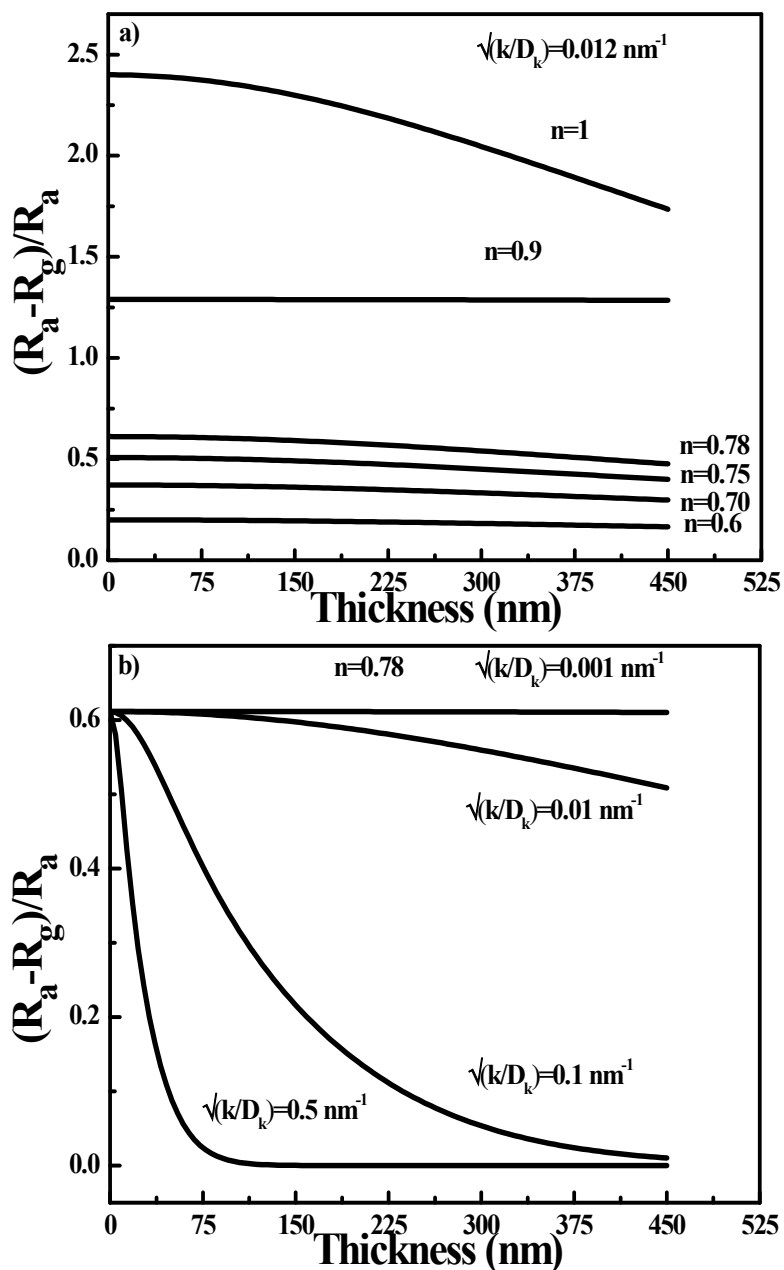

**Fig S2** Simulated variation of response with film thickness for various (a) sensitivities ( $n$ ) and (b)  $\sqrt{k/D_k}$  values. In these simulations we have assumed fixed gas concentration ( $C_{AS} \sim 500$  ppm), and sensor operating temperature ( $T \sim 598\text{K}$ ). For Fig. S2(a)  $\sqrt{k/D_k} \sim 0.012 \text{ nm}^{-1}$  and for Fig. S2(b)  $n \sim 0.78$ .

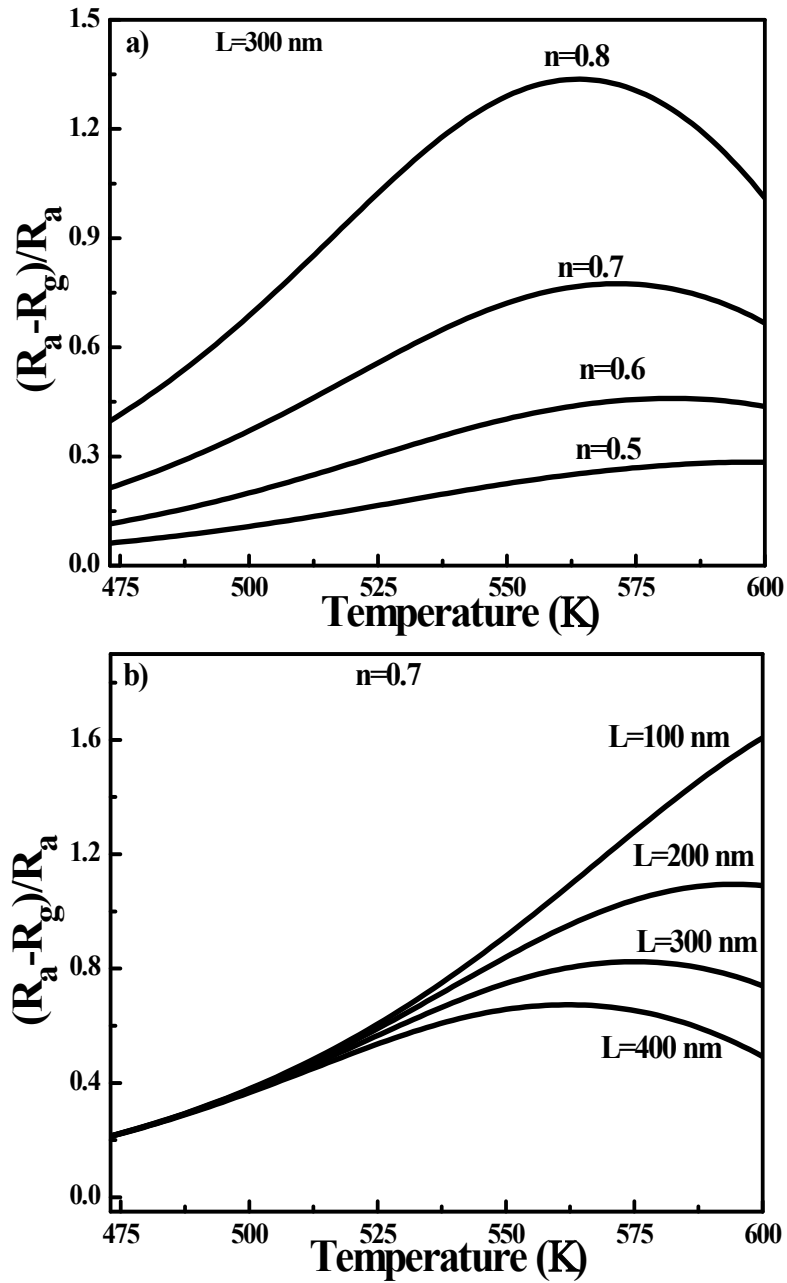

**Fig.S3** Simulated variation of the response with operating temperature for various (a) sensitivities ( $n$ ) and (b) film thicknesses ( $L$ ) of sensing elements. In these simulations we have assumed fixed gas concentration ( $C_{AS} \sim 500$  ppm). For Fig. S3(a)  $L \sim 300$  nm and for Fig. S3(b)  $n \sim 0.7$ .

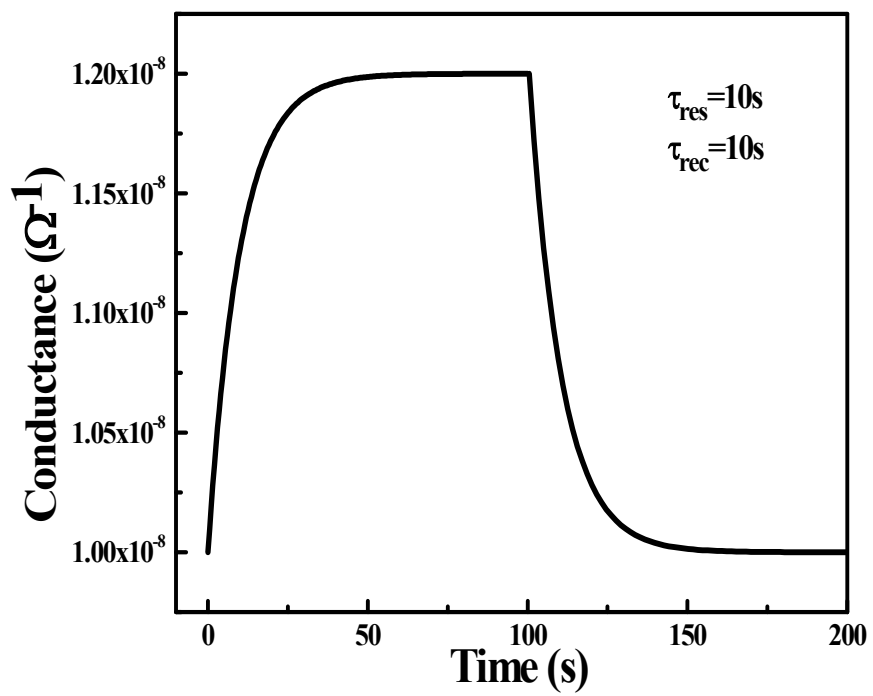

Fig.S4 Simulated response and recovery profile for 'n' type chemi-resistive thin film sensor.
